# Supplementary material for: The Longitudinal Contribution of Early Morphological Awareness Skills to Reading Fluency and Comprehension in Greek
Source: PubMed Central journal article supplement (PMC5645533; doi:10.3389/fpsyg.2017.01793), 2017-10-13
Supplement: Appendix.pdf [file Appendix.pdf]

## Appendix

### Morphological Awareness Tasks

#### Word Analogy (inflection)

| No  | Original items                                                           | English translation <sup>1</sup>                                 |
|-----|--------------------------------------------------------------------------|------------------------------------------------------------------|
| 1.  | /ja'tri/- /ja'tros/ : /ae'ti/ <sup>2</sup> -.... (/ae'tos/) <sup>3</sup> | 'doctors'- 'doctor' : 'eagles'- ... ('eagle')                    |
| 2.  | /perpa'to/-/pe'rpatisa/ : /voi'tho/- ...(/vo'ithisa/)                    | 'I walk'- 'I walked' : 'I help'-... ('I helped')                 |
| 3.  | /ekopsa/- /'kovo/ : /'eγrapsa/ -.... (/ 'γrafo/)                         | 'I cut'- 'I cut' : 'I wrote'-... ('I write')                     |
| 4.  | /pino/- /'epina/ : /'vlepo/-... (/ 'evlepa/)                             | 'I drink' – 'I was drinking' : 'I see'-... ('I was seeing')      |
| 5.  | /si'kono/- /si'konome/ : /xte'nizo/-... (/xte'nizome/)                   | 'I raise' – 'I raised' : 'I comb'-... ('I am combed')            |
| 6.  | /xano/- /'exasa/ : /'ðeno/-... (/eðesa/)                                 | 'I lose' – 'I lost' : 'I tie'-... ('I tied')                     |
| 7.  | /dinome/- /'diθika/ : /ze'stenome/-... (/ze'staθika/)                    | 'I dress up' - 'I dressed up' : 'I warm up' -... ('I warmed up') |
| 8.  | /a'rxizo/ - /a'rxizume/ : /ðu'levo/-... (/ðu'levume/)                    | 'I start' - 'We start' : 'I work' -... ('We work')               |
| 9.  | /θa proxo'rizo/ - /proxo'ro/ : /θa oði'γiso/-... (/oði'γo/)              | 'I will move on' - 'I move on' : 'I will drive' -... ('I drive') |
| 10. | /ðasos/- /'ðasi/ : /laθos/-... (/laθi/)                                  | 'forest' - 'forests' : 'mistake' -... ('mistakes')               |

Note: <sup>1</sup> English translation corresponds roughly to the meaning of the Greek items and are not following always a corresponding morphological analogy rule, because of the morphological differences among languages; <sup>2</sup> Stress is indicated (across all tasks' items in the Appendix) with the symbol ' before each stressed syllable and the stressed part of the syllable is always its vowel constituent (e.g., the word 'ae'tos' is pronounced as /aetós/); <sup>3</sup> Correct answers are the words in the parentheses.

#### Word Analogy (derivation)

| No  | Original items                                                 | English translation <sup>1</sup>                            |
|-----|----------------------------------------------------------------|-------------------------------------------------------------|
| 1.  | 'skavo/ - /'skapsimo/ : /'trexo/ - .... (/ 'treksimo/)         | 'dig' – 'digging' : 'run' - .... ('running')                |
| 2.  | /ko'lo/ - /kseko'lo/ : /ði'pso/ - .... (/kseði'pso/)           | 'glue' – 'winkle' : 'thirst' - .... ('quench one's thirst') |
| 3.  | /omorfos/ - /omo'rfça/ : /nostimos/ - .... (/nosti'mnã/)       | 'beautiful' – 'beauty' : 'delicious' - .... ('delicacy')    |
| 4.  | /krivo/ - /kri'menos/ : /vafo/ - .... (/va'menos/)             | 'hide' – 'hidden' : 'paint' - .... ('painted')              |
| 5.  | /spiti/ - /spi'taki/ : /ðondi/ - .... (/ðo'ndaki/)             | 'house' – 'small house' : 'tough' - .... ('small tooth')    |
| 6.  | /ku'no/ - /'kunima/ : /xti'po/ - .... (/xtipima/)              | 'shake' – 'shaking' : 'hit' - .... ('hitting')              |
| 7.  | /stamati'menos/ - /stama'to/ : /aγapi'menos/ - .... (/aγa'po/) | 'stopped' – 'stop' : 'beloved' - .... ('love')              |
| 8.  | /fuska/ - /fu'skono/ : /kli'ði/ - .... (/kli'ðono/)            | 'bubble' – 'bubbling' : 'key' - .... ('lock')               |
| 9.  | /ftisimo/ - /ftino/ : /pçasimo/ - .... (/pçano/)               | 'spitting' – 'spit' : 'gripping' - .... ('grip')            |
| 10. | /mi'kros/ - /mi'kreno/ : /xo'ndros/ - .... (/xo'ndreno/)       | 'short' – 'shorten' : 'thick' - .... ('thicken')            |

Note: <sup>1</sup> English translation corresponds roughly to the meaning of the Greek items and are not following always a corresponding morphological analogy rule, because of the morphological differences among languages.

#### Production of inflected forms

| No  | Original items                                                     | English translation                                                  |
|-----|--------------------------------------------------------------------|----------------------------------------------------------------------|
| 1.  | /kaθa'rizo/ : /ta pe'ðja 'tora/..... (/kaθa'rizon/)                | "I clean up": Children are ..... "cleaning up" now                   |
| 2.  | /γra'mis/ : /zo'γrafisa 'pente/..... (/γra'mes/)                   | "line" : I painted five..... "lines".                                |
| 3.  | /γi'rizo/ : / 'avrio to pro'i o 'nikos/..... (/θa γi'risi/)        | "I return" : Tomorrow morning Nikos..... "will return".              |
| 4.  | /lustika/ : /'tora sto 'spiti e'γo/..... (/luzome/)                | "I bathed" : Now at home..... "I am bathing".                        |
| 5.  | /ma'θitries/ : /i aðe'rfi mu 'ine/..... (/ma'θitria/)              | "students" : My sister is a..... "student"                           |
| 6.  | /xo'revete/ : /xtes e'γo si'nexia/..... (/xoreva/)                 | "You are dancing" : Yesterday, ..... "I was dancing" all the time.   |
| 7.  | /ko'libise/ : /e'mis 'tora/..... (/koli'bame/)                     | "He swam" : We ..... "swim" now                                      |
| 8.  | /ci'mame/ : /xtes se mnã sti'γmi e'mis/..... (/cimi'θikame/)       | "I sleep" : Yesterday ..... "we slept" for a while.                  |
| 9.  | /epeses/ : /to mo'ro 'tora/..... (/pefti/)                         | "You fell" : The baby is ..... "falling" now.                        |
| 10. | /ksekino/ : /me'ta apo mnã 'ora ta 'trena/..... (/θa kseki'nison/) | "start" : After an hour the trains..... "will start"                 |
| 11. | /ku'razome/ : /e'mis 'tora/..... (/kura'zomaste/)                  | "I'm tired" : We ..... "are tired" now                               |
| 12. | /erya'ton/ : /o 'kostas 'ine/..... (/e'ryatis/)                    | "workers" : Kostas is a..... "worker"                                |
| 13. | /tro'mazun/ : /xtes se mnã sti'γmi o 'takis/..... (/tromakse/)     | "They frighten" : Yesterday, Takis .... "was frightened" for a while |
| 14. | /zo'γrafisan/ : /e'sis 'tora/..... (/zoγra'fizete/)                | "They painted" : You are ..... "painting" now                        |

|     |                                                                      |                                                                  |
|-----|----------------------------------------------------------------------|------------------------------------------------------------------|
| 15. | ono'maton/ : /af'tos 'exi 'ðio/.....(/o'nomata/)                     | “names” : He has two..... “names”                                |
| 16. | /'klei/ : /e'sis 'tora γia'ti/.....(/'klete/)?                       | “He cries” : why..... “are you crying” now?                      |
| 17. | /'ftɕaxnis/ : /xtes se 'm̥pa sti'ymi ta pe'ðja to/.....(/eftɕaksan/) | “You make” : Yesterday, the children..... “made it” at a moment. |
| 18. | /pa'paðes/ : /af'tos 'ine/.....(/pa'pas/)                            | “Priests.” : He is a..... “priest”.                              |
| 19. | /'epekxa/ : /ta γa'tacia 'tora/.....(/'pezun/)                       | “I played” : The kittens are now..... “playing”.                 |
| 20. | /'a'kute/ : /o 'nikos 'tora ðen/.....(/a'kui/)                       | “You listen” : Nikos doesn't ..... “listen” now.                 |

Note: <sup>1</sup> English translation corresponds roughly to the meaning of the Greek items in order to retain the syntax according to the English norms.

### Manipulation of derived forms

| No  | C   | Original items                                           | English translation <sup>1</sup>                 |
|-----|-----|----------------------------------------------------------|--------------------------------------------------|
| 1.  | Der | /fo'ni/ : /o 'nikos 'tora/.....(/fo'nazi/)               | “voice” : Nikos ..... “raises his voice” now.    |
| 2.  | Der | /'sproxno/ : /to a'maksi 'θeli/.....(/'sproksimo/)       | “I push” : The car needs to be..... “pushed”.    |
| 3.  | Der | /ta'ksiði/ : /ta ka'ravja 'tora/.....(/taksi'ðevun/)     | “travel” : The ships are ..... “traveling” now.  |
| 4.  | Der | /xroma'tizo/ : /i i'kones 'ine/.....(/xromati'stes/)     | “color” : Images are..... “colored”.             |
| 5.  | Der | /'scivo/ : /o 'sakis 'ine 'panda/.....(/sci'ftos/)       | “I bend” : Sakis is always..... “bent”.          |
| 6.  | Der | /'siðero/ : /i mixa'ni 'ine/.....(/siðe'repa/)           | “iron” : The machine is..... “made of iron”      |
| 7.  | Der | /'klino/ : /to ku'ti 'ine/.....(/kli'sto/)               | “close” : The box is..... “closed”.              |
| 8.  | Der | /'psari/ : /o 'θios mu 'ine/.....(/psa'ras/)             | “fish” : My uncle is a..... “fisherman”.         |
| 9.  | Der | /'zvino/ : /to ce'ri 'ine/.....(/zvi'sto/)               | “extinguish” : The candle is..... “extinguished” |
| 10. | Der | /'ksilo/ : /to kre'vati mu 'ine/.....(/'ksilino/)        | “wood” : My bed is..... “wooden”                 |
| 11. | D   | /proe'ðrio/ : /o ba'bas mu 'ine/.....(/'proeðros/)       | “presidency” : My dad is..... “president”.       |
| 12. | D   | /'ðe'rmatino/ : /i 'zoni 'ftɕaxtike a'po/.....(/'ðerma/) | “leather” : The belt was made of..... “leather”  |
| 13. | D   | /'isixazo/ : /e'γo 'ime/.....(/'isixos/)                 | “I quieten” : I am..... “quiet”.                 |
| 14. | D   | /'psisimo/ : /o pa'pus po'les fo'res/.....(/'psini/)     | “baking” : The grandfather often..... “bakes”.   |
| 15. | D   | /'xtistis/ : /o 'kostas 'tora/.....(/'xtizi/)            | “builder” : Kostas now..... “builds”.            |
| 16. | D   | /'tre'xala/ : /e'mis 'tora/.....(/'trexume/)             | “at a run” : We are ... “running” now.           |
| 17. | D   | /'ektos/ : /ta γa'tacia pu 'metrisa 'itan/.....(/'eksi/) | “sixth” : The kittens I counted were..... “six”. |
| 18. | D   | /'lemo'naða/ : /'ftɕaxtike a'po/.....(/le'moni/)         | “lemonade” : Made of..... “lemon”.               |
| 19. | D   | /'ksexa'zmenos/ : /e'γo si'nexia/.....(/kse'xnao/)       | “forgotten” : I keep..... “forgetting”.          |
| 20. | D   | /'trayuði'stis/ : /'kaθe 'vraði e'γo/.....(/trayu'ðao/)  | “singer” : Every night I..... “sing”.            |

Note: C = Condition; Der = Derivative condition; D = Decomposing condition; <sup>1</sup> English translation corresponds roughly to the meaning of the Greek items in order to retain the syntax according to the English norms.

### Compound word segmentation

| No  | Items <sup>1</sup> | Lexical elements – Expected Answer                        |
|-----|--------------------|-----------------------------------------------------------|
| 1.  | /ri'zoγalo/        | < /'riz(i)/ 'rice' + /'γal(a)/ 'milk'                     |
| 2.  | /aγri'anθropos/    | < /'aγri(os)/ 'wild' + /'anθrop(os)/ 'man'                |
| 3.  | /γalazo'prasino/   | < /'γa'laz(jo)/ 'light blue' + /'prasin(o)/ 'green'       |
| 4.  | /trelo'koritso/    | < /tre'l(o)/ 'crazy' + /ko'rits(i)/ 'girl'                |
| 5.  | /'psarota'verna/   | < /'psar(i)/ 'fish' + /ta'vern(a)/ 'tavern'               |
| 6.  | /'me'ronixto/      | < /'mer(a)/ 'day' + /'nixt(a)/ 'night'                    |
| 7.  | /'kse'roklaðo/     | < /kse'r(o)/ 'dry' + /kla'ð(i)/ 'branch'                  |
| 8.  | /'anavo'zvinume/   | < /a'navum(e)/ 'we light up' + /'zvinum(e)/ 'we turn off' |
| 9.  | /'maxero'piruna/   | < /ma'xer(ja)/ 'knives' + /pi'run(ia)/ 'forks'            |
| 10. | /'siyotrayu'ðo/    | < /si'γa/ 'slowly' + /trayu'ð(o)/ 'sing'                  |
| 11. | /'avγo'lemono/     | < /av'γ(o)/ 'egg' + /le'mon(i)/ 'lemon'                   |
| 12. | /'kuklo'θeatro/    | < /'kukl(a)/ 'doll' + /'θeatr(o)/ 'theater'               |
| 13. | /'xarto'mandilo/   | < /xa'rt(i)/ 'paper' + /ma'ndil(i)/ 'handkerchief'        |
| 14. | /'nero'potiro/     | < /ne'r(o)/ 'water' + /po'tir(i)/ 'glass'                 |
| 15. | /'kitrino'kokinos/ | < /'kitrin(os)/ 'yellow' + /'kokin(os)/ 'red'             |
| 16. | /'pijeno'erxome/   | < /pi'jen(o)/ 'go' + /'erxom(e)/ 'come'                   |

Note: <sup>1</sup> English translations are not given for compound words, because there is not always a corresponding English word. For this reason we provided only the English translation of the lexical elements in the second column.

### Compound word reversal

| No  | Items <sup>1</sup> | Lexical elements                          | Expected Answer  |
|-----|--------------------|-------------------------------------------|------------------|
| 1.  | /ço'nonero/        | < /çon(i) 'snow' + ne'r(o) 'water'        | > /ne'roçono/    |
| 2.  | /ksi'noylikos/     | < /ksi'n(os) 'sour' + /yli'k(os) 'sweet'  | > /yli'koksinos/ |
| 3.  | /fi'ðoxorto/       | < /fið(i) 'snake' + /xort(o) 'grass'      | > /xo'rtofiðo/   |
| 4.  | /ko'ndoxondri/     | < /ko'nd(i) 'short' + /xo'ndr(i) 'fat'    | > /xo'ndrokondi/ |
| 5.  | /ski'lospito/      | < /skil(os) 'dog' + /spit(i) 'house'      | > /spi'toskilo/  |
| 6.  | /a'spromavros/     | < /aspr(os) 'white' + /mavr(os) 'black'   | > /mav'roaspros/ |
| 7.  | /nero'luluðo/      | < /ne'r(o) 'water' + /lu'luð(i) 'flower'  | > /lulu'ðonero/  |
| 8.  | /spi'rtokuta/      | < /spirt(a) 'matches' + /ku't(ça) 'boxes' | > /ku'tospirta/  |
| 9.  | /ste'nomakro/      | < /ste'n(o) 'narrow' + /ma'kr(i) 'long'   | > /ma'krosteno/  |
| 10. | /cefa'loponos/     | < ce'fal(i) 'head' + /pon(os) 'ache'      | > /pono'cefalos/ |

Note: <sup>1</sup> English translations are not given for compound words (items and expected answers), because there is not always a corresponding English word. For this reason we provided only the English translation of the lexical elements in the second column.

### Compound word production

| No  | Items "What would we call ..." | Expected Answer <sup>1</sup>                |
|-----|--------------------------------|---------------------------------------------|
| 1.  | /ti 'fluða tis pa'tatas/?      | 'the peel of the potato'?" > /pata'tofluða/ |
| 2.  | /ena 'asximo pa'pi/?           | 'an ugly duck'?" > /asxi'mopapo/            |
| 3.  | /tin 'tripa tu lemoni'u/?      | 'the hole of the lemon'?" > /lemo'notripa/  |
| 4.  | /ton vi'vlion ti 'θiki/?       | 'the books' case'?" > /vivlio'θiki/         |
| 5.  | /otan ci'mame stra'va/?        | 'when I sleep awry'?" > /stravoci'mame/     |
| 6.  | /tis 'γatas to 'ðromo/?        | 'the cat's road;?" > /γα'toðromo/           |
| 7.  | /mna 'pita a'po ko'rðona/?     | 'a pie of cords'?" > /korðo'nopita/         |
| 8.  | /tu sapu'niu ti 'fuska/?       | 'the soap's bubble'?" > /sapu'nofuska/      |
| 9.  | /to xi'mo tis do'matas/?       | 'the juice of the tomato'?" > /domatoxi'mo/ |
| 10. | /mna sa'lata apo mo'livja/?    | 'a salad of pencils'?" > /molivosa'lata/    |
| 11. | /ena pe'ði 'plusio/?           | 'a rich child'?" > /plusi'opeðo/            |
| 12. | /otan kri'fa ki'tazo/?         | 'when I look secretly'?" > /krifoki'tazo/   |
| 13. | /mna xri'si 'miya/?            | 'a golden fly'?" > /xri'somiya/             |
| 14. | /ti fo'la tis γa'riðas/?       | 'the nest of the shrimp'?" > /γariðofo'la/  |
| 15. | /ena 'xoma 'kokino/?           | 'a red soil'?" > /koki'noxoma/              |

Note: <sup>1</sup> English translations are not given for compound words in the expected answers, because there is not always a corresponding English word. For this reason we provided only the English translation of the compound word's description in the second column.
